# Supplementary material for: A combination risk assessment of paracetamol: electrochemical oxidation behavior and cytotoxic effect evaluation of paracetamol in the presence of N1,N2-dibenzylethane-1,2-diamine
Source: Royal Society of Chemistry journal article supplement (doi:10.1039/c5nj03250d), 2016-01-01
Supplement: c5nj03250d1.pdf [file c5nj03250d1.pdf]

**A combination risk assessment of paracetamol: electrochemical oxidation behavior and cytotoxicity evaluation effects of paracetamol in the presence of  $N^1,N^2$ -dibenzylethane-1,2-diamine**

B. Dowlati <sup>a,\*</sup>, M. Rozali Othman <sup>a</sup>, A. Ahmad <sup>a</sup>, E. Safaei <sup>b</sup>

<sup>a</sup>School of Chemical Sciences and Food Technology, Faculty of Science and Technology, Universiti Kebangsaan Malaysia 43600 UKM Bangi Selangor, Malaysia

<sup>b</sup>Department of Chemistry, Faculty of Sciences, Kurdistan University, Pasdaran St., 66177 Sanandaj, Iran

## Table of contents

| Title                                   | Page |
|-----------------------------------------|------|
| FT-IR SPECTRUM OF 3.....                | 2    |
| <sup>1</sup> H-NMR SPECTRUM OF 3.....   | 4    |
| <sup>13</sup> C-NMR SPECTRUM OF 3.....  | 5    |
| ESI-MS <sup>2</sup> SPECTRUM OF 3.....  | 6    |
| FT-IR SPECTRUM OF 11.....               | 7    |
| <sup>1</sup> H-NMR SPECTRUM OF 11.....  | 8    |
| <sup>13</sup> C-NMR SPECTRUM OF 11..... | 9    |
| ESI-MS <sup>2</sup> SPECTRUM OF 11..... | 10   |
| CYTOTOXICITY TEST REPORTS.....          | 11   |
| CYTOTOXICITY TEST OF PARACETAMOL.....   | 11   |
| CYTOTOXICITY TEST OF PRODUCT 11.....    | 14   |

# FT-IR spectrum of 3

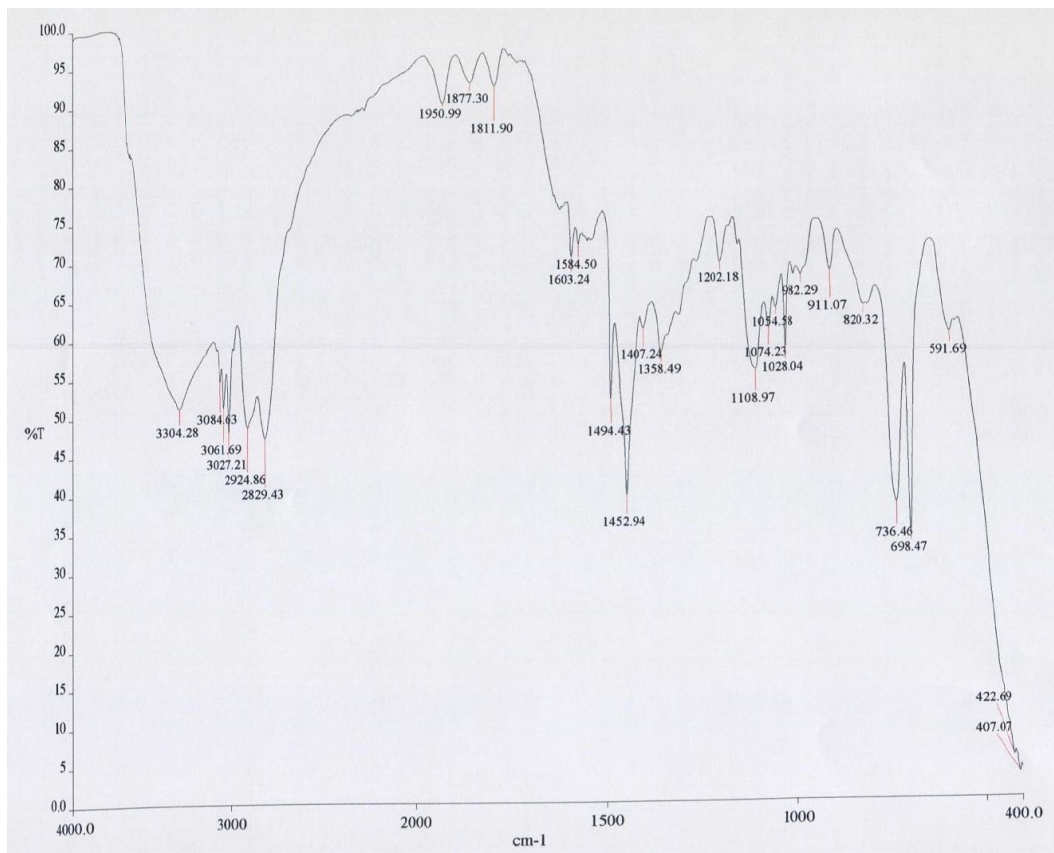

# <sup>1</sup>H-NMR spectrum of 3

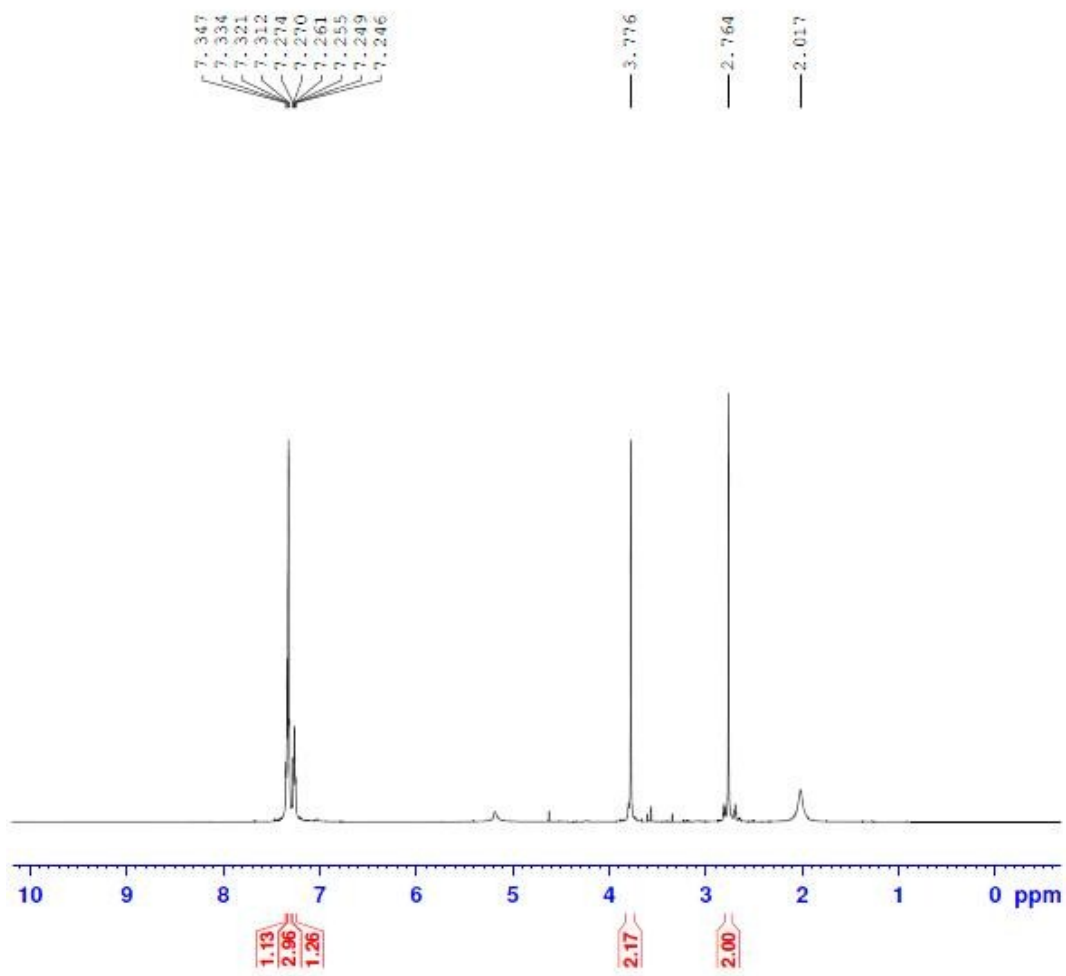

# $^{13}\text{C}$ -NMR spectrum of 3

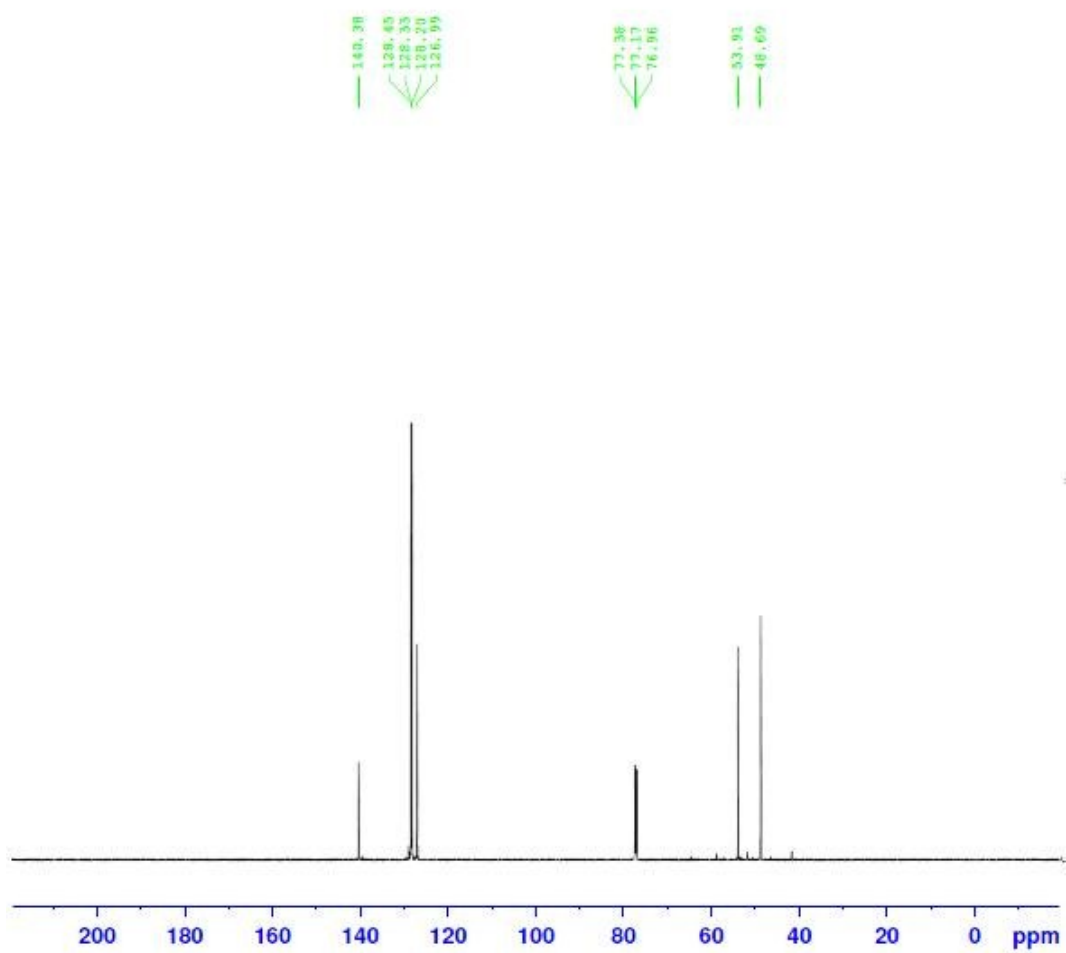

# ESI-MS<sup>2</sup> spectrum of 3

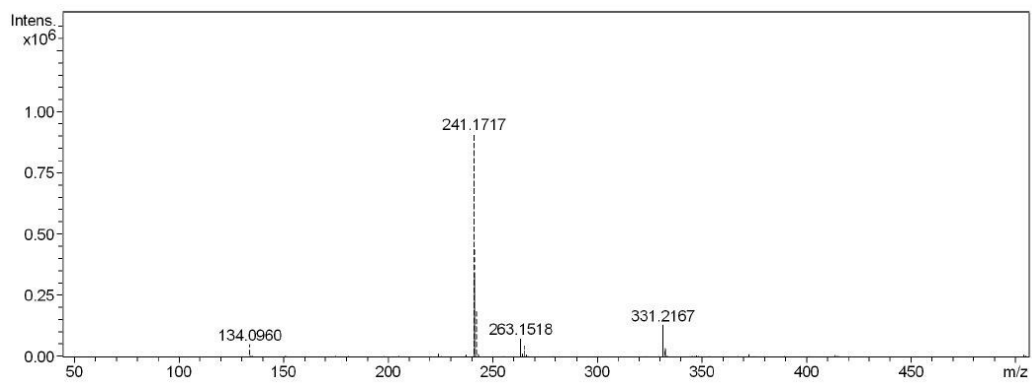

# FT-IR spectrum of 11

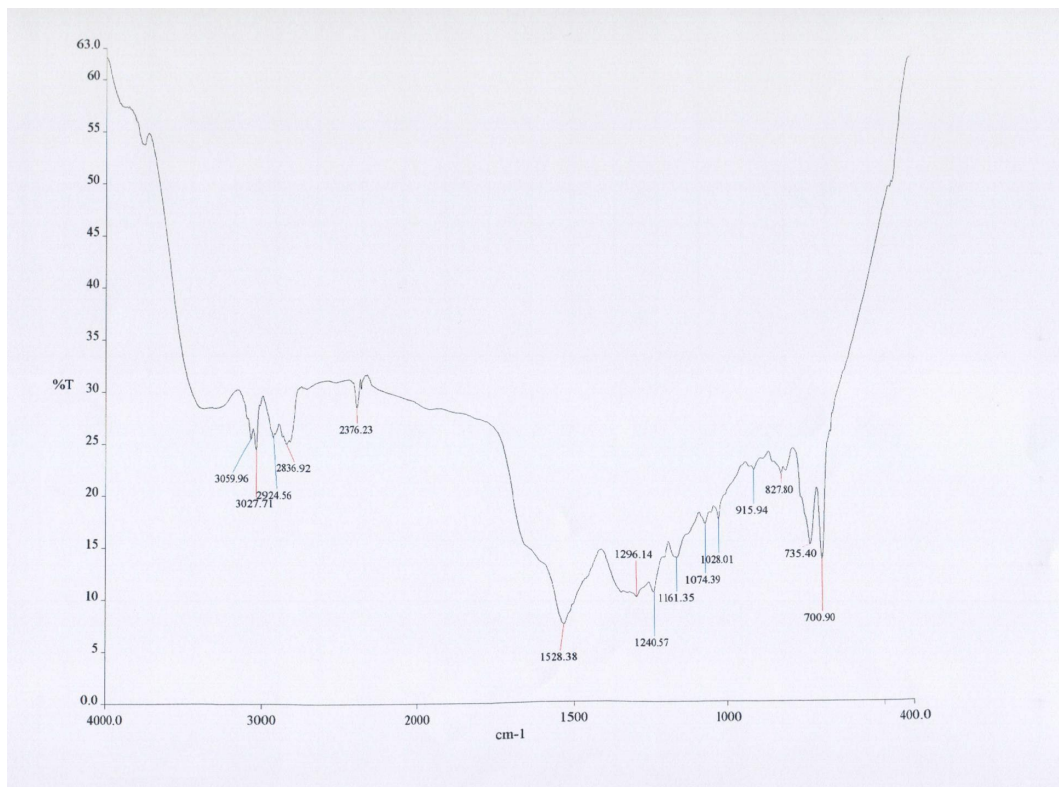

# <sup>1</sup>H-NMR spectrum of 11

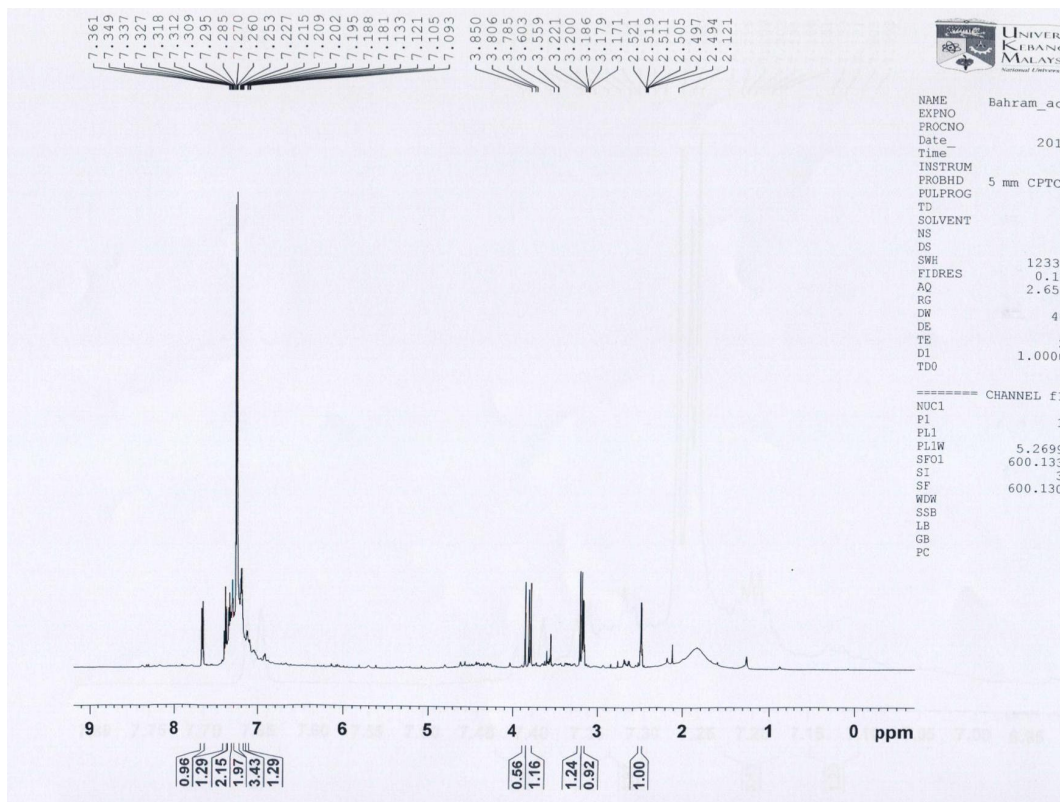



# <sup>13</sup>C-NMR spectrum of 11

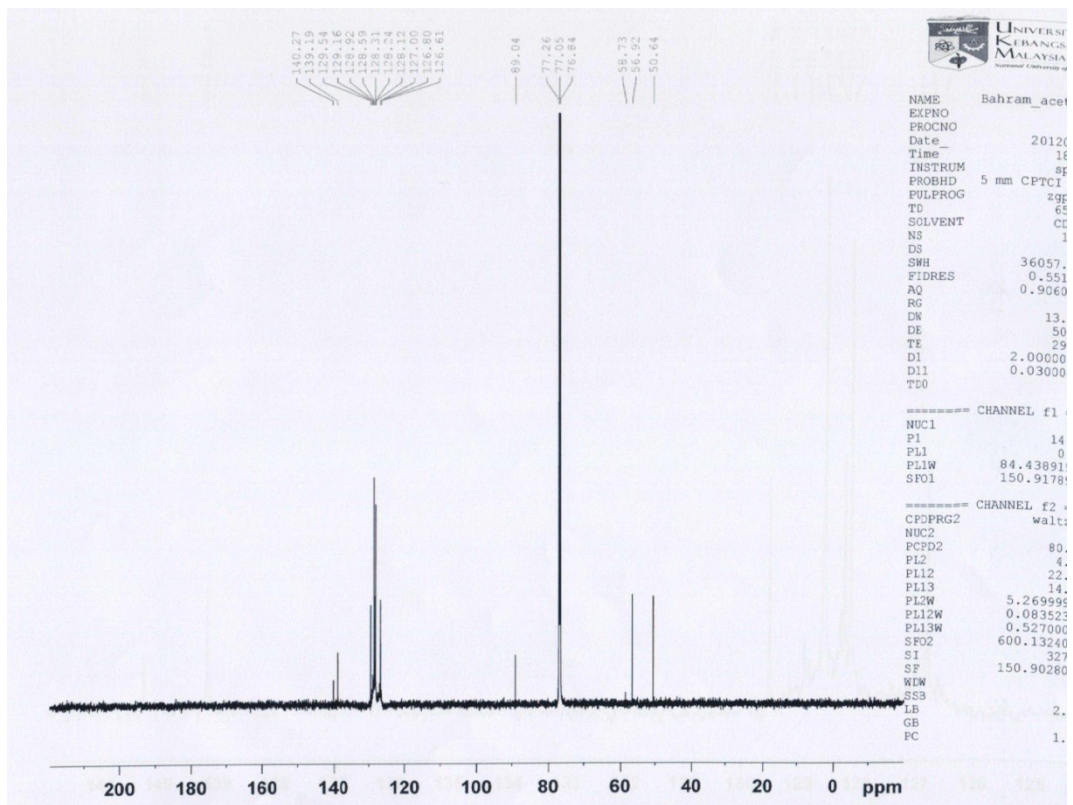

# ESI-MS<sup>2</sup> spectrum of 11

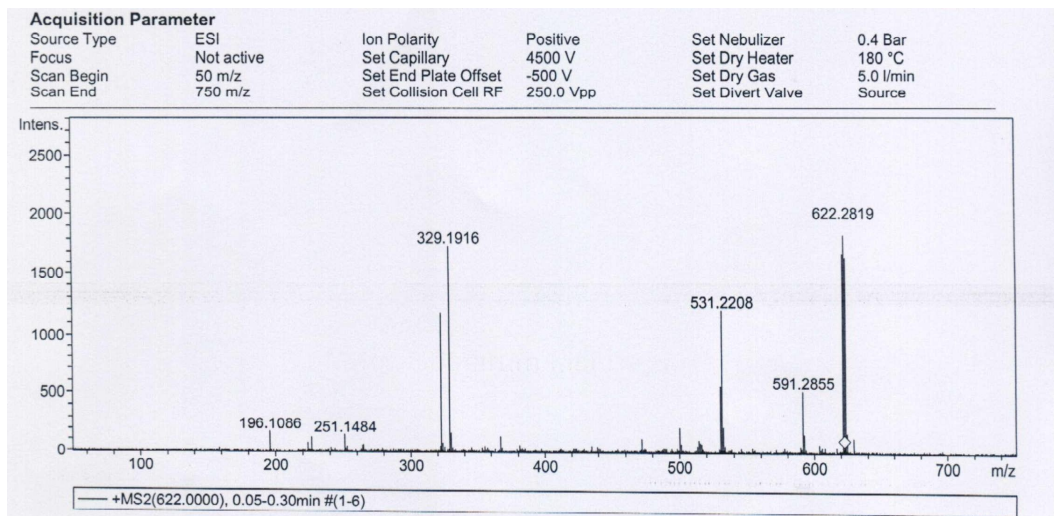

# CYTOTOXICITY TEST REPORTS

## Cytotoxicity Test of Paracetamol

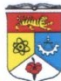

UNIVERSITI KEBANGSAAN MALAYSIA  
The National University of Malaysia

Makmal Bioserasi

Centre for Research and Instrumentation Management

### TEST REPORT

STUDY REPORT NUMBER: MB-TC-04-D-45-12

Study Completion Date: 08 MAR 2013

**Title: TEST FOR CYTOTOXICITY**  
(MTT ASSAY)

#### Paracetamol

| <u>Study Sponsor</u>                                                                                                                                                                 | <u>Testing Facility</u>                                                                                       |
|--------------------------------------------------------------------------------------------------------------------------------------------------------------------------------------|---------------------------------------------------------------------------------------------------------------|
| <b>Prof. Dr. Mohamed Rozali Othman</b><br>Department of Chemistry,<br>Faculty of Science and Technology,<br>Universiti Kebangsaan Malaysia<br>43600 UKM Bangi<br>Selangor, Malaysia. | <b>Makmal Bioserasi</b><br>CRIM<br>Universiti Kebangsaan Malaysia<br>43600 UKM Bangi<br>Selangor<br>Malaysia. |

**Study Director** : Assoc Prof Dr Nor Fadilah Rajab

**Quality Assurance Personnel** : Nurhafizah Zam

- The reproduction of this report is authorised only in the form of a complete report.
- This report contains 13 pages.
- This test report concerns only the product being tested.

Makmal Bioserasi, Centre for Research and Instrumentation Management,  
Universiti Kebangsaan Malaysia, 43600 UKM Bangi, Selangor Darul Ehsan  
Telefon: +603-8921 4280 Faksimili: +603-8921 4281 E-mel: [dranuar@ukm.my](mailto:dranuar@ukm.my)

#### 14.0 VERIFICATION

I the undersigned declare that the methods, results and data contained in this report faithfully reflect the procedures used and raw data collected during the study.

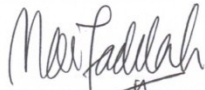

.....  
Assoc. Prof. Dr Nor Fadilah Rajab  
Study Director

08 MAK 2013

.....  
Date

**Note:** This report is NOT a Quality Assurance Certificate OR an approved permit. This report applies and refers only to the sample of the specific test article/material submitted by the client at the time of collection/receipt. The results shall not be used to indicate or imply that they are applicable to other similar articles/products. In addition, such results must not be used to indicate or imply that Makmal Bioserasi approves, recommends or endorses the manufacturer, supplier or user of such articles/products or that Makmal Bioserasi in any way guarantees the later performance of the articles/products. This report or any part thereof shall not be reproduced for advertising or other purposes by any means or form without a written permission from the Laboratory Director of Makmal Bioserasi.

**15.0 QUALITY ASSURANCE INSPECTIONS STATEMENT**

This study has been inspected by the Quality Assurance Personnel, and the findings have been reported to Study Director and Principal Investigator on the following dates:

| <b>Dates of Inspection</b> | <b>Procedures Inspected</b>               | <b>Date Reported to Study Director &amp; Principal Investigator</b> |
|----------------------------|-------------------------------------------|---------------------------------------------------------------------|
| 25 Feb 2013                | Preparation of cell culture               | 6 Mar 2013                                                          |
| 26 Feb 2013                | Preparation of test material dilutions    | 6 Mar 2013                                                          |
| 26 Feb 2013                | Exposure of test material to cell culture | 6 Mar 2013                                                          |
| 5 Mar 2013                 | Data & Report                             | 6 Mar 2013                                                          |
| 6 Mar 2013                 | Data & Report                             | 6 Mar 2013                                                          |

  
\_\_\_\_\_  
Nurhafizah Zam  
Quality Assurance Personnel

08 MAR 2013  
\_\_\_\_\_  
Date

**Note:** This report is NOT a Quality Assurance Certificate OR an approved permit. This report applies and refers only to the sample of the specific test article/material submitted by the client at the time of collection/receipt. The results shall not be used to indicate or imply that they are applicable to other similar articles/products. In addition, such results must not be used to indicate or imply that Makmal Bioserasi approves, recommends or endorses the manufacturer, supplier or user of such articles/products or that Makmal Bioserasi in any way guarantees the later performance of the articles/products. This report or any part thereof shall not be reproduced for advertising or other purposes by any means or form without a written permission from the Laboratory Director of Makmal Bioserasi.

# Cytotoxicity Test of Product 11

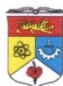

UNIVERSITI KEBANGSAAN MALAYSIA  
The National University of Malaysia

Makmal Bioserasi

Centre for Research and Instrumentation Management

## TEST REPORT

STUDY REPORT NUMBER: MB-TC-04-D-43-12

Study Completion Date: 08 MAR 2013

**Title: TEST FOR CYTOTOXICITY**  
(MTT ASSAY)

Aceta 1

| <u>Study Sponsor</u>                                                                                                                                                                 | <u>Testing Facility</u>                                                                                       |
|--------------------------------------------------------------------------------------------------------------------------------------------------------------------------------------|---------------------------------------------------------------------------------------------------------------|
| <b>Prof. Dr. Mohamed Rozali Othman</b><br>Department of Chemistry,<br>Faculty of Science and Technology,<br>Universiti Kebangsaan Malaysia<br>43600 UKM Bangi<br>Selangor, Malaysia. | <b>Makmal Bioserasi</b><br>CRIM<br>Universiti Kebangsaan Malaysia<br>43600 UKM Bangi<br>Selangor<br>Malaysia. |

**Study Director** : Assoc Prof Dr Nor Fadilah Rajab

**Quality Assurance Personnel** : Nurhafizah Zam

- The reproduction of this report is authorised only in the form of a complete report.
- This report contains 13 pages.
- This test report concerns only the product being tested.

Makmal Bioserasi, Centre for Research and Instrumentation Management,  
Universiti Kebangsaan Malaysia, 43600 UKM Bangi, Selangor Darul Ehsan  
Telefon: +603-8921 4280 Faksimili: +603-8921 4281 E-mel: [dranuar@ukm.my](mailto:dranuar@ukm.my)

**14.0 VERIFICATION**

I the undersigned declare that the methods, results and data contained in this report faithfully reflect the procedures used and raw data collected during the study.

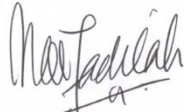

.....  
Assoc Prof Dr Nor Fadilah Rajab  
Study Director

08 MAR 2013

.....  
Date

**Note:** This report is NOT a Quality Assurance Certificate OR an approved permit. This report applies and refers only to the sample of the specific test article/material submitted by the client at the time of collection/receipt. The results shall not be used to indicate or imply that they are applicable to other similar articles/products. In addition, such results must not be used to indicate or imply that Makmal Bioserasi approves, recommends or endorses the manufacturer, supplier or user of such articles/products or that Makmal Bioserasi in any way guarantees the later performance of the articles/products. This report or any part thereof shall not be reproduced for advertising or other purposes by any means or form without a written permission from the Laboratory Director of Makmal Bioserasi.

**15.0 QUALITY ASSURANCE INSPECTIONS STATEMENT**

This study has been inspected by the Quality Assurance Personnel, and the findings have been reported to Study Director and Principal Investigator on the following dates:

| <b>Dates of Inspection</b> | <b>Procedures Inspected</b> | <b>Date Reported to Study Director &amp; Principal Investigator</b> |
|----------------------------|-----------------------------|---------------------------------------------------------------------|
| 4 Mar 2013                 | Data & Report               | 4 Mar 2013                                                          |
| 5 Mar 2013                 | Report                      | 5 Mar 2013                                                          |

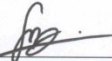  
\_\_\_\_\_  
Nurhafizah Zam  
Quality Assurance Personnel

08 MAR 2013  
\_\_\_\_\_  
Date

**Note:** This report is NOT a Quality Assurance Certificate OR an approved permit. This report applies and refers only to the sample of the specific test article/material submitted by the client at the time of collection/receipt. The results shall not be used to indicate or imply that they are applicable to other similar articles/products. In addition, such results must not be used to indicate or imply that Makmal Bioserasi approves, recommends or endorses the manufacturer, supplier or user of such articles/products or that Makmal Bioserasi in any way guarantees the later performance of the articles/products. This report or any part thereof shall not be reproduced for advertising or other purposes by any means or form without a written permission from the Laboratory Director of Makmal Bioserasi.
